# Supplementary material for: Optimized double-digest genotyping by sequencing (ddGBS) method with high-density SNP markers and high genotyping accuracy for chickens
Source: PubMed Central journal article supplement (PMC5466311; doi:10.1371/journal.pone.0179073), 2017-06-09
Supplement: pone.0179073.s003.pdf [file pone.0179073.s003.pdf]

**S1 Table. PCR primers and 24 barcode sequences.**

| <b>ID</b>         | <b>Sequence (5'to3')</b>                                      | <b>Modify</b> |
|-------------------|---------------------------------------------------------------|---------------|
| GBS_PCR_primerF   | AATGATACGGCGACCACCGAGATCTACACTCTTTCCCTACACGACGCTCTTCCGATCT    |               |
| GBS_PCR_primerR   | CAAGCAGAAGACGGCATACGAGATCGGTCTCGGCATTCCTGCTGAACCGCTCTTCCGATCT |               |
| CommonAda_Mse_1   | TAAGATCGGAAGAGCGGTTCAGCAGGAATGCCGAG                           | 5'P           |
| CommonAda_Mse_2   | CTCGGCATTCCTGCTGAACCGCTCTTCCGATCT                             |               |
| CommonAda_Msp_1   | CGAGATCGGAAGAGCGGTTCAGCAGGAATGCCGAG                           | 5'P           |
| CommonAda_Msp_2   | CTCGGCATTCCTGCTGAACCGCTCTTCCGATCT                             |               |
| CommonAda_Apek_1  | CWGAGATCGGAAGAGCGGTTCAGCAGGAATGCCGAG                          | 5'P           |
| CommonAda_Apek_2  | CTCGGCATTCCTGCTGAACCGCTCTTCCGATCT                             |               |
| Bar01_Ada_EcoRI_1 | ACACTCTTTCCCTACACGACGCTCTTCCGATCTAACAGT                       |               |
| Bar01_Ada_EcoRI_2 | AATTACTGTTAGATCGGAAGAGCGTCGTGTAGGGAAAGAGTGT                   | 5'P           |
| Bar02_Ada_EcoRI_1 | ACACTCTTTCCCTACACGACGCTCTTCCGATCTCCAGTA                       |               |
| Bar02_Ada_EcoRI_2 | AATTTACTGGAGATCGGAAGAGCGTCGTGTAGGGAAAGAGTGT                   | 5'P           |
| Bar03_Ada_EcoRI_1 | ACACTCTTTCCCTACACGACGCTCTTCCGATCTTTGCAC                       |               |
| Bar03_Ada_EcoRI_2 | AATTGTGCAAAGATCGGAAGAGCGTCGTGTAGGGAAAGAGTGT                   | 5'P           |
| Bar04_Ada_EcoRI_1 | ACACTCTTTCCCTACACGACGCTCTTCCGATCTGGTTCA                       |               |
| Bar04_Ada_EcoRI_2 | AATTTGAACCAGATCGGAAGAGCGTCGTGTAGGGAAAGAGTGT                   | 5'P           |
| Bar05_Ada_EcoRI_1 | ACACTCTTTCCCTACACGACGCTCTTCCGATCTAACGTC                       |               |
| Bar05_Ada_EcoRI_2 | AATTGACGTTAGATCGGAAGAGCGTCGTGTAGGGAAAGAGTGT                   | 5'P           |
| Bar06_Ada_EcoRI_1 | ACACTCTTTCCCTACACGACGCTCTTCCGATCTCCAAGT                       |               |
| Bar06_Ada_EcoRI_2 | AATTACTTGGAGATCGGAAGAGCGTCGTGTAGGGAAAGAGTGT                   | 5'P           |
| Bar07_Ada_PstI_1  | ACACTCTTTCCCTACACGACGCTCTTCCGATCTGAACTGCTGCA                  |               |
| Bar07_Ada_PstI_2  | GCAGTTCAGATCGGAAGAGCGTCGTGTAGGGAAAGAGTGT                      | 5'P           |
| Bar08_Ada_PstI_1  | ACACTCTTTCCCTACACGACGCTCTTCCGATCTACCATGTTGCA                  |               |
| Bar08_Ada_PstI_2  | ACATGGTAGATCGGAAGAGCGTCGTGTAGGGAAAGAGTGT                      | 5'P           |
| Bar09_Ada_PstI_1  | ACACTCTTTCCCTACACGACGCTCTTCCGATCTCTTGAGCTGCA                  |               |
| Bar09_Ada_PstI_2  | GCTCAAGAGATCGGAAGAGCGTCGTGTAGGGAAAGAGTGT                      | 5'P           |
| Bar10_Ada_PstI_1  | ACACTCTTTCCCTACACGACGCTCTTCCGATCTACGTGGTTGCA                  |               |
| Bar10_Ada_PstI_2  | ACCACGTAGATCGGAAGAGCGTCGTGTAGGGAAAGAGTGT                      | 5'P           |
| Bar11_Ada_PstI_1  | ACACTCTTTCCCTACACGACGCTCTTCCGATCTGGAACGTTGCA                  |               |
| Bar11_Ada_PstI_2  | ACGTTCCAGATCGGAAGAGCGTCGTGTAGGGAAAGAGTGT                      | 5'P           |
| Bar12_Ada_PstI_1  | ACACTCTTTCCCTACACGACGCTCTTCCGATCTCACTAGCTGCA                  |               |
| Bar12_Ada_PstI_2  | GCTAGTGAGATCGGAAGAGCGTCGTGTAGGGAAAGAGTGT                      | 5'P           |
| Bar13_Ada_PstI_1  | ACACTCTTTCCCTACACGACGCTCTTCCGATCTATTCTGCTGCA                  |               |
| Bar13_Ada_PstI_2  | GCAGAATAGATCGGAAGAGCGTCGTGTAGGGAAAGAGTGT                      | 5'P           |
| Bar14_Ada_PstI_1  | ACACTCTTTCCCTACACGACGCTCTTCCGATCTCGGAGGTTGCA                  |               |
| Bar14_Ada_PstI_2  | ACCTCCGAGATCGGAAGAGCGTCGTGTAGGGAAAGAGTGT                      | 5'P           |
| Bar15_Ada_PstI_1  | ACACTCTTTCCCTACACGACGCTCTTCCGATCTTAAGAACTGCA                  |               |
| Bar15_Ada_PstI_2  | GTTCTTAAGATCGGAAGAGCGTCGTGTAGGGAAAGAGTGT                      | 5'P           |
| Bar16_Ada_BglII_1 | ACACTCTTTCCCTACACGACGCTCTTCCGATCTGAGAACGT                     |               |

|                   |                                               |     |
|-------------------|-----------------------------------------------|-----|
| Bar16_Ada_BglII_2 | GATCACGTTCTCAGATCGGAAGAGCGTCGTGTAGGGAAAGAGTGT | 5'P |
| Bar17_Ada_BglII_1 | ACACTCTTTCCTACACGACGCTCTCCGATCTCCTCCAGC       |     |
| Bar17_Ada_BglII_2 | GATCGCTGGAGGAGATCGGAAGAGCGTCGTGTAGGGAAAGAGTGT | 5'P |
| Bar18_Ada_BglII_1 | ACACTCTTTCCTACACGACGCTCTCCGATCTATCTTGGC       |     |
| Bar18_Ada_BglII_2 | GATCGCCAAGATAGATCGGAAGAGCGTCGTGTAGGGAAAGAGTGT | 5'P |
| Bar19_Ada_HinPI_1 | ACACTCTTTCCTACACGACGCTCTCCGATCTAAGAATCGC      |     |
| Bar19_Ada_HinPI_2 | CGGCGATTCTTAGATCGGAAGAGCGTCGTGTAGGGAAAGAGTGT  | 5'P |
| Bar20_Ada_HinPI_1 | ACACTCTTTCCTACACGACGCTCTCCGATCTCCTCCATGC      |     |
| Bar20_Ada_HinPI_2 | CGGCATGGAGGAGATCGGAAGAGCGTCGTGTAGGGAAAGAGTGT  | 5'P |
| Bar21_Ada_HinPI_1 | ACACTCTTTCCTACACGACGCTCTCCGATCTATCTTCGGC      |     |
| Bar21_Ada_HinPI_2 | CGGCCGAAGATAGATCGGAAGAGCGTCGTGTAGGGAAAGAGTGT  | 5'P |
| Bar22_Ada_HinPI_1 | ACACTCTTTCCTACACGACGCTCTCCGATCTTGGAGGCGC      |     |
| Bar22_Ada_HinPI_2 | CGGCGCCTCCAAGATCGGAAGAGCGTCGTGTAGGGAAAGAGTGT  | 5'P |
| Bar23_Ada_HinPI_1 | ACACTCTTTCCTACACGACGCTCTCCGATCTGAAGAATGC      |     |
| Bar23_Ada_HinPI_2 | CGGCATTCTCAGATCGGAAGAGCGTCGTGTAGGGAAAGAGTGT   | 5'P |
| Bar24_Ada_HinPI_1 | ACACTCTTTCCTACACGACGCTCTCCGATCTACCTCTGGC      |     |
| Bar24_Ada_HinPI_2 | CGCCAGAGGTAGATCGGAAGAGCGTCGTGTAGGGAAAGAGTGT   | 5'P |
