# Supplementary material for: Optimized double-digest genotyping by sequencing (ddGBS) method with high-density SNP markers and high genotyping accuracy for chickens
Source: PubMed Central journal article supplement (PMC5466311; doi:10.1371/journal.pone.0179073), 2017-06-09
Supplement: pone.0179073.s004.pdf [file pone.0179073.s004.pdf]

**S2 Table. Barcode adaptor (BA) sequences (96-plex).**

| ID              | Sequence (5'to3')                         | Modify |
|-----------------|-------------------------------------------|--------|
| B01_Ada_EcoRI_1 | ACACTCTTTCCCTACACGACGCTCTTCCGATCTAACAGT   |        |
| B02_Ada_EcoRI_1 | ACACTCTTTCCCTACACGACGCTCTTCCGATCTCCAGTA   |        |
| B03_Ada_EcoRI_1 | ACACTCTTTCCCTACACGACGCTCTTCCGATCTTTGCAC   |        |
| B04_Ada_EcoRI_1 | ACACTCTTTCCCTACACGACGCTCTTCCGATCTGCTTCA   |        |
| B05_Ada_EcoRI_1 | ACACTCTTTCCCTACACGACGCTCTTCCGATCTAACGTC   |        |
| B06_Ada_EcoRI_1 | ACACTCTTTCCCTACACGACGCTCTTCCGATCTCCAAGT   |        |
| B07_Ada_EcoRI_1 | ACACTCTTTCCCTACACGACGCTCTTCCGATCTTTGTCA   |        |
| B08_Ada_EcoRI_1 | ACACTCTTTCCCTACACGACGCTCTTCCGATCTAGTCAC   |        |
| B09_Ada_EcoRI_1 | ACACTCTTTCCCTACACGACGCTCTTCCGATCTAATGCT   |        |
| B10_Ada_EcoRI_1 | ACACTCTTTCCCTACACGACGCTCTTCCGATCTCCGATC   |        |
| B11_Ada_EcoRI_1 | ACACTCTTTCCCTACACGACGCTCTTCCGATCTTTACGA   |        |
| B12_Ada_EcoRI_1 | ACACTCTTTCCCTACACGACGCTCTTCCGATCTGTCTAT   |        |
| B13_Ada_EcoRI_1 | ACACTCTTTCCCTACACGACGCTCTTCCGATCTAATCGA   |        |
| B14_Ada_EcoRI_1 | ACACTCTTTCCCTACACGACGCTCTTCCGATCTCCGTAT   |        |
| B15_Ada_EcoRI_1 | ACACTCTTTCCCTACACGACGCTCTTCCGATCTTTAGCC   |        |
| B16_Ada_EcoRI_1 | ACACTCTTTCCCTACACGACGCTCTTCCGATCTCGCATA   |        |
| B17_Ada_EcoRI_1 | ACACTCTTTCCCTACACGACGCTCTTCCGATCTAAGCAT   |        |
| B18_Ada_EcoRI_1 | ACACTCTTTCCCTACACGACGCTCTTCCGATCTCTATGC   |        |
| B19_Ada_EcoRI_1 | ACACTCTTTCCCTACACGACGCTCTTCCGATCTTCCGCA   |        |
| B20_Ada_EcoRI_1 | ACACTCTTTCCCTACACGACGCTCTTCCGATCTAGTATC   |        |
| B21_Ada_EcoRI_1 | ACACTCTTTCCCTACACGACGCTCTTCCGATCTGAACCT   |        |
| B22_Ada_EcoRI_1 | ACACTCTTTCCCTACACGACGCTCTTCCGATCTCCTTGA   |        |
| B23_Ada_EcoRI_1 | ACACTCTTTCCCTACACGACGCTCTTCCGATCTTTCGAT   |        |
| B24_Ada_EcoRI_1 | ACACTCTTTCCCTACACGACGCTCTTCCGATCTTGGACC   |        |
| B25_Ada_EcoRI_1 | ACACTCTTTCCCTACACGACGCTCTTCCGATCTGAACTGC  |        |
| B26_Ada_EcoRI_1 | ACACTCTTTCCCTACACGACGCTCTTCCGATCTACCATGT  |        |
| B27_Ada_EcoRI_1 | ACACTCTTTCCCTACACGACGCTCTTCCGATCTTTGAGC   |        |
| B28_Ada_EcoRI_1 | ACACTCTTTCCCTACACGACGCTCTTCCGATCTACGTGGT  |        |
| B29_Ada_EcoRI_1 | ACACTCTTTCCCTACACGACGCTCTTCCGATCTGCAACGT  |        |
| B30_Ada_EcoRI_1 | ACACTCTTTCCCTACACGACGCTCTTCCGATCTCACTAGC  |        |
| B31_Ada_EcoRI_1 | ACACTCTTTCCCTACACGACGCTCTTCCGATCTATTCTGC  |        |
| B32_Ada_EcoRI_1 | ACACTCTTTCCCTACACGACGCTCTTCCGATCTCGGAGGT  |        |
| B33_Ada_EcoRI_1 | ACACTCTTTCCCTACACGACGCTCTTCCGATCTTAAGAAC  |        |
| B34_Ada_EcoRI_1 | ACACTCTTTCCCTACACGACGCTCTTCCGATCTGACCTCT  |        |
| B35_Ada_EcoRI_1 | ACACTCTTTCCCTACACGACGCTCTTCCGATCTACTTCGC  |        |
| B36_Ada_EcoRI_1 | ACACTCTTTCCCTACACGACGCTCTTCCGATCTCTAGGTT  |        |
| B37_Ada_EcoRI_1 | ACACTCTTTCCCTACACGACGCTCTTCCGATCTTGAACC   |        |
| B38_Ada_EcoRI_1 | ACACTCTTTCCCTACACGACGCTCTTCCGATCTGCCTCAT  |        |
| B39_Ada_EcoRI_1 | ACACTCTTTCCCTACACGACGCTCTTCCGATCTATTTCGTT |        |
| B40_Ada_EcoRI_1 | ACACTCTTTCCCTACACGACGCTCTTCCGATCTTAGGTGC  |        |

|                 |                                            |  |
|-----------------|--------------------------------------------|--|
| B41_Ada_EcoRI_1 | ACACTCTTTCCCTACACGACGCTCTTCCGATCTCGAATAC   |  |
| B42_Ada_EcoRI_1 | ACACTCTTTCCCTACACGACGCTCTTCCGATCTCCTCAGT   |  |
| B43_Ada_EcoRI_1 | ACACTCTTTCCCTACACGACGCTCTTCCGATCTATCTGCC   |  |
| B44_Ada_EcoRI_1 | ACACTCTTTCCCTACACGACGCTCTTCCGATCTTAGGCTT   |  |
| B45_Ada_EcoRI_1 | ACACTCTTTCCCTACACGACGCTCTTCCGATCTAGACAAT   |  |
| B46_Ada_EcoRI_1 | ACACTCTTTCCCTACACGACGCTCTTCCGATCTCCTAGCC   |  |
| B47_Ada_EcoRI_1 | ACACTCTTTCCCTACACGACGCTCTTCCGATCTATCTCGT   |  |
| B48_Ada_EcoRI_1 | ACACTCTTTCCCTACACGACGCTCTTCCGATCTTGAGTTC   |  |
| B49_Ada_EcoRI_1 | ACACTCTTTCCCTACACGACGCTCTTCCGATCTGAGAACGT  |  |
| B50_Ada_EcoRI_1 | ACACTCTTTCCCTACACGACGCTCTTCCGATCTCCTCCAGC  |  |
| B51_Ada_EcoRI_1 | ACACTCTTTCCCTACACGACGCTCTTCCGATCTATCTTGGC  |  |
| B52_Ada_EcoRI_1 | ACACTCTTTCCCTACACGACGCTCTTCCGATCTCGAGGTGT  |  |
| B53_Ada_EcoRI_1 | ACACTCTTTCCCTACACGACGCTCTTCCGATCTTAGAATGC  |  |
| B54_Ada_EcoRI_1 | ACACTCTTTCCCTACACGACGCTCTTCCGATCTGCCTTAGT  |  |
| B55_Ada_EcoRI_1 | ACACTCTTTCCCTACACGACGCTCTTCCGATCTATTCCGGC  |  |
| B56_Ada_EcoRI_1 | ACACTCTTTCCCTACACGACGCTCTTCCGATCTTGGAGCGT  |  |
| B57_Ada_EcoRI_1 | ACACTCTTTCCCTACACGACGCTCTTCCGATCTGAAGATGC  |  |
| B58_Ada_EcoRI_1 | ACACTCTTTCCCTACACGACGCTCTTCCGATCTCCTGTAGT  |  |
| B59_Ada_EcoRI_1 | ACACTCTTTCCCTACACGACGCTCTTCCGATCTATCCGCGC  |  |
| B60_Ada_EcoRI_1 | ACACTCTTTCCCTACACGACGCTCTTCCGATCTTAGTCGGT  |  |
| B61_Ada_EcoRI_1 | ACACTCTTTCCCTACACGACGCTCTTCCGATCTAGAACACT  |  |
| B62_Ada_EcoRI_1 | ACACTCTTTCCCTACACGACGCTCTTCCGATCTCCTTACGC  |  |
| B63_Ada_EcoRI_1 | ACACTCTTTCCCTACACGACGCTCTTCCGATCTATCCTGTT  |  |
| B64_Ada_EcoRI_1 | ACACTCTTTCCCTACACGACGCTCTTCCGATCTTGAGGTCC  |  |
| B65_Ada_EcoRI_1 | ACACTCTTTCCCTACACGACGCTCTTCCGATCTGAGAAGTC  |  |
| B66_Ada_EcoRI_1 | ACACTCTTTCCCTACACGACGCTCTTCCGATCTCCGCGAGT  |  |
| B67_Ada_EcoRI_1 | ACACTCTTTCCCTACACGACGCTCTTCCGATCTATCTCCGT  |  |
| B68_Ada_EcoRI_1 | ACACTCTTTCCCTACACGACGCTCTTCCGATCTTATGTTCC  |  |
| B69_Ada_EcoRI_1 | ACACTCTTTCCCTACACGACGCTCTTCCGATCTGTAAC TTC |  |
| B70_Ada_EcoRI_1 | ACACTCTTTCCCTACACGACGCTCTTCCGATCTCCTCAGCT  |  |
| B71_Ada_EcoRI_1 | ACACTCTTTCCCTACACGACGCTCTTCCGATCTTCTGATC   |  |
| B72_Ada_EcoRI_1 | ACACTCTTTCCCTACACGACGCTCTTCCGATCTGGAGTCGT  |  |
| B73_Ada_EcoRI_1 | ACACTCTTTCCCTACACGACGCTCTTCCGATCTAAGAATCGC |  |
| B74_Ada_EcoRI_1 | ACACTCTTTCCCTACACGACGCTCTTCCGATCTCCTCCATGC |  |
| B75_Ada_EcoRI_1 | ACACTCTTTCCCTACACGACGCTCTTCCGATCTATCTTCGGC |  |
| B76_Ada_EcoRI_1 | ACACTCTTTCCCTACACGACGCTCTTCCGATCTTGGAGGCGC |  |
| B77_Ada_EcoRI_1 | ACACTCTTTCCCTACACGACGCTCTTCCGATCTGAAGAATGC |  |
| B78_Ada_EcoRI_1 | ACACTCTTTCCCTACACGACGCTCTTCCGATCTACCCTGGC  |  |
| B79_Ada_EcoRI_1 | ACACTCTTTCCCTACACGACGCTCTTCCGATCTCATCTCCGC |  |
| B80_Ada_EcoRI_1 | ACACTCTTTCCCTACACGACGCTCTTCCGATCTGTGAGGTGC |  |
| B81_Ada_EcoRI_1 | ACACTCTTTCCCTACACGACGCTCTTCCGATCTTGAGAAGGC |  |
| B82_Ada_EcoRI_1 | ACACTCTTTCCCTACACGACGCTCTTCCGATCTACCTTGCGC |  |
| B83_Ada_EcoRI_1 | ACACTCTTTCCCTACACGACGCTCTTCCGATCTCATCTGGC  |  |

|                 |                                              |    |
|-----------------|----------------------------------------------|----|
| B84_Ada_EcoRI_1 | ACACTCTTTCCCTACACGACGCTCTTCCGATCTTTAGGCTGC   |    |
| B85_Ada_EcoRI_1 | ACACTCTTTCCCTACACGACGCTCTTCCGATCTCGGAACTCC   |    |
| B86_Ada_EcoRI_1 | ACACTCTTTCCCTACACGACGCTCTTCCGATCTGCCTCACTC   |    |
| B87_Ada_EcoRI_1 | ACACTCTTTCCCTACACGACGCTCTTCCGATCTATTCTTGGC   |    |
| B88_Ada_EcoRI_1 | ACACTCTTTCCCTACACGACGCTCTTCCGATCTTAGAGGTCC   |    |
| B89_Ada_EcoRI_1 | ACACTCTTTCCCTACACGACGCTCTTCCGATCTAGAGAACTC   |    |
| B90_Ada_EcoRI_1 | ACACTCTTTCCCTACACGACGCTCTTCCGATCTACTCGCGGC   |    |
| B91_Ada_EcoRI_1 | ACACTCTTTCCCTACACGACGCTCTTCCGATCTCACTCTCGC   |    |
| B92_Ada_EcoRI_1 | ACACTCTTTCCCTACACGACGCTCTTCCGATCTTTAGTGTCC   |    |
| B93_Ada_EcoRI_1 | ACACTCTTTCCCTACACGACGCTCTTCCGATCTCGGAATGTC   |    |
| B94_Ada_EcoRI_1 | ACACTCTTTCCCTACACGACGCTCTTCCGATCTGCCTTATCC   |    |
| B95_Ada_EcoRI_1 | ACACTCTTTCCCTACACGACGCTCTTCCGATCTATTCCGCTC   |    |
| B96_Ada_EcoRI_1 | ACACTCTTTCCCTACACGACGCTCTTCCGATCTTACGGCGGC   |    |
| B01_Ada_EcoRI_2 | AATTACTGTTAGATCGGAAGAGCGTCGTGTAGGGAAAGAGTGT  | 5P |
| B02_Ada_EcoRI_2 | AATTTACTGGAGATCGGAAGAGCGTCGTGTAGGGAAAGAGTGT  | 5P |
| B03_Ada_EcoRI_2 | AATTGTGCAAAGATCGGAAGAGCGTCGTGTAGGGAAAGAGTGT  | 5P |
| B04_Ada_EcoRI_2 | AATTTGAAGCAGATCGGAAGAGCGTCGTGTAGGGAAAGAGTGT  | 5P |
| B05_Ada_EcoRI_2 | AATTGACGTTAGATCGGAAGAGCGTCGTGTAGGGAAAGAGTGT  | 5P |
| B06_Ada_EcoRI_2 | AATTACTTGGAGATCGGAAGAGCGTCGTGTAGGGAAAGAGTGT  | 5P |
| B07_Ada_EcoRI_2 | AATTTGACAAAGATCGGAAGAGCGTCGTGTAGGGAAAGAGTGT  | 5P |
| B08_Ada_EcoRI_2 | AATTGTGACTAGATCGGAAGAGCGTCGTGTAGGGAAAGAGTGT  | 5P |
| B09_Ada_EcoRI_2 | AATTAGCATTAGATCGGAAGAGCGTCGTGTAGGGAAAGAGTGT  | 5P |
| B10_Ada_EcoRI_2 | AATTGATCGGAGATCGGAAGAGCGTCGTGTAGGGAAAGAGTGT  | 5P |
| B11_Ada_EcoRI_2 | AATTTGTAAGATCGGAAGAGCGTCGTGTAGGGAAAGAGTGT    | 5P |
| B12_Ada_EcoRI_2 | AATTATAGACAGATCGGAAGAGCGTCGTGTAGGGAAAGAGTGT  | 5P |
| B13_Ada_EcoRI_2 | AATTTGCGATTAGATCGGAAGAGCGTCGTGTAGGGAAAGAGTGT | 5P |
| B14_Ada_EcoRI_2 | AATTATACGAGATCGGAAGAGCGTCGTGTAGGGAAAGAGTGT   | 5P |
| B15_Ada_EcoRI_2 | AATTGGCTAAAGATCGGAAGAGCGTCGTGTAGGGAAAGAGTGT  | 5P |
| B16_Ada_EcoRI_2 | AATTTATGCGAGATCGGAAGAGCGTCGTGTAGGGAAAGAGTGT  | 5P |
| B17_Ada_EcoRI_2 | AATTATGCTTAGATCGGAAGAGCGTCGTGTAGGGAAAGAGTGT  | 5P |
| B18_Ada_EcoRI_2 | AATTGCATAGAGATCGGAAGAGCGTCGTGTAGGGAAAGAGTGT  | 5P |
| B19_Ada_EcoRI_2 | AATTTGCGGAAGATCGGAAGAGCGTCGTGTAGGGAAAGAGTGT  | 5P |
| B20_Ada_EcoRI_2 | AATTGATACTAGATCGGAAGAGCGTCGTGTAGGGAAAGAGTGT  | 5P |
| B21_Ada_EcoRI_2 | AATTAGGTTTCAGATCGGAAGAGCGTCGTGTAGGGAAAGAGTGT | 5P |
| B22_Ada_EcoRI_2 | AATTTCAAGGAGATCGGAAGAGCGTCGTGTAGGGAAAGAGTGT  | 5P |
| B23_Ada_EcoRI_2 | AATTATCGAAAGATCGGAAGAGCGTCGTGTAGGGAAAGAGTGT  | 5P |
| B24_Ada_EcoRI_2 | AATTGGTCCAAGATCGGAAGAGCGTCGTGTAGGGAAAGAGTGT  | 5P |
| B25_Ada_EcoRI_2 | AATTGCAGTTCAGATCGGAAGAGCGTCGTGTAGGGAAAGAGTGT | 5P |
| B26_Ada_EcoRI_2 | AATTACATGGTAGATCGGAAGAGCGTCGTGTAGGGAAAGAGTGT | 5P |
| B27_Ada_EcoRI_2 | AATTGCTCAAGAGATCGGAAGAGCGTCGTGTAGGGAAAGAGTGT | 5P |
| B28_Ada_EcoRI_2 | AATTACCACGTAGATCGGAAGAGCGTCGTGTAGGGAAAGAGTGT | 5P |
| B29_Ada_EcoRI_2 | AATTACGTTGCAGATCGGAAGAGCGTCGTGTAGGGAAAGAGTGT | 5P |
| B30_Ada_EcoRI_2 | AATTGCTAGTGAGATCGGAAGAGCGTCGTGTAGGGAAAGAGTGT | 5P |

|                 |                                                |     |
|-----------------|------------------------------------------------|-----|
| B31_Ada_EcoRI_2 | AATTGCAGAATAGATCGGAAGAGCGTCGTGTAGGGAAAGAGTGT   | 5'P |
| B32_Ada_EcoRI_2 | AATTACCTCCGAGATCGGAAGAGCGTCGTGTAGGGAAAGAGTGT   | 5'P |
| B33_Ada_EcoRI_2 | AATTGTTCTTAAGATCGGAAGAGCGTCGTGTAGGGAAAGAGTGT   | 5'P |
| B34_Ada_EcoRI_2 | AATTAGAGGTCAGATCGGAAGAGCGTCGTGTAGGGAAAGAGTGT   | 5'P |
| B35_Ada_EcoRI_2 | AATTGCGAAGTAGATCGGAAGAGCGTCGTGTAGGGAAAGAGTGT   | 5'P |
| B36_Ada_EcoRI_2 | AATTAACCTAGAGATCGGAAGAGCGTCGTGTAGGGAAAGAGTGT   | 5'P |
| B37_Ada_EcoRI_2 | AATTGGTTCCAAGATCGGAAGAGCGTCGTGTAGGGAAAGAGTGT   | 5'P |
| B38_Ada_EcoRI_2 | AATTATGAGGCAGATCGGAAGAGCGTCGTGTAGGGAAAGAGTGT   | 5'P |
| B39_Ada_EcoRI_2 | AATTAACGAATAGATCGGAAGAGCGTCGTGTAGGGAAAGAGTGT   | 5'P |
| B40_Ada_EcoRI_2 | AATTGCACCTAAGATCGGAAGAGCGTCGTGTAGGGAAAGAGTGT   | 5'P |
| B41_Ada_EcoRI_2 | AATTGTATTTCGAGATCGGAAGAGCGTCGTGTAGGGAAAGAGTGT  | 5'P |
| B42_Ada_EcoRI_2 | AATTACTGAGGAGATCGGAAGAGCGTCGTGTAGGGAAAGAGTGT   | 5'P |
| B43_Ada_EcoRI_2 | AATTGGCAGATAGATCGGAAGAGCGTCGTGTAGGGAAAGAGTGT   | 5'P |
| B44_Ada_EcoRI_2 | AATTAAGCCTAAGATCGGAAGAGCGTCGTGTAGGGAAAGAGTGT   | 5'P |
| B45_Ada_EcoRI_2 | AATTATTGTCTAGATCGGAAGAGCGTCGTGTAGGGAAAGAGTGT   | 5'P |
| B46_Ada_EcoRI_2 | AATTGGCTAGGAGATCGGAAGAGCGTCGTGTAGGGAAAGAGTGT   | 5'P |
| B47_Ada_EcoRI_2 | AATTACGAGATAGATCGGAAGAGCGTCGTGTAGGGAAAGAGTGT   | 5'P |
| B48_Ada_EcoRI_2 | AATTGAACTCAAGATCGGAAGAGCGTCGTGTAGGGAAAGAGTGT   | 5'P |
| B49_Ada_EcoRI_2 | AATTACGTTCAGATCGGAAGAGCGTCGTGTAGGGAAAGAGTGT    | 5'P |
| B50_Ada_EcoRI_2 | AATTGCTGGAGGAGATCGGAAGAGCGTCGTGTAGGGAAAGAGTGT  | 5'P |
| B51_Ada_EcoRI_2 | AATTGCCAAGATAGATCGGAAGAGCGTCGTGTAGGGAAAGAGTGT  | 5'P |
| B52_Ada_EcoRI_2 | AATTACACCTCGAGATCGGAAGAGCGTCGTGTAGGGAAAGAGTGT  | 5'P |
| B53_Ada_EcoRI_2 | AATTGCATTCTAAGATCGGAAGAGCGTCGTGTAGGGAAAGAGTGT  | 5'P |
| B54_Ada_EcoRI_2 | AATTACTAAGGCAGATCGGAAGAGCGTCGTGTAGGGAAAGAGTGT  | 5'P |
| B55_Ada_EcoRI_2 | AATTGCCGGAATAGATCGGAAGAGCGTCGTGTAGGGAAAGAGTGT  | 5'P |
| B56_Ada_EcoRI_2 | AATTACGCTCCAAGATCGGAAGAGCGTCGTGTAGGGAAAGAGTGT  | 5'P |
| B57_Ada_EcoRI_2 | AATTGCATCTCAGATCGGAAGAGCGTCGTGTAGGGAAAGAGTGT   | 5'P |
| B58_Ada_EcoRI_2 | AATTACTACAGGAGATCGGAAGAGCGTCGTGTAGGGAAAGAGTGT  | 5'P |
| B59_Ada_EcoRI_2 | AATTGCGCGGATAGATCGGAAGAGCGTCGTGTAGGGAAAGAGTGT  | 5'P |
| B60_Ada_EcoRI_2 | AATTACCGACTAAGATCGGAAGAGCGTCGTGTAGGGAAAGAGTGT  | 5'P |
| B61_Ada_EcoRI_2 | AATTAGTGTCTAGATCGGAAGAGCGTCGTGTAGGGAAAGAGTGT   | 5'P |
| B62_Ada_EcoRI_2 | AATTGCGTAAGGAGATCGGAAGAGCGTCGTGTAGGGAAAGAGTGT  | 5'P |
| B63_Ada_EcoRI_2 | AATTAACAGGATAGATCGGAAGAGCGTCGTGTAGGGAAAGAGTGT  | 5'P |
| B64_Ada_EcoRI_2 | AATTGGACCTCAAGATCGGAAGAGCGTCGTGTAGGGAAAGAGTGT  | 5'P |
| B65_Ada_EcoRI_2 | AATTGACTTCTCAGATCGGAAGAGCGTCGTGTAGGGAAAGAGTGT  | 5'P |
| B66_Ada_EcoRI_2 | AATTACTCGCGGAGATCGGAAGAGCGTCGTGTAGGGAAAGAGTGT  | 5'P |
| B67_Ada_EcoRI_2 | AATTACGAGATAGATCGGAAGAGCGTCGTGTAGGGAAAGAGTGT   | 5'P |
| B68_Ada_EcoRI_2 | AATTGGAACATAAGATCGGAAGAGCGTCGTGTAGGGAAAGAGTGT  | 5'P |
| B69_Ada_EcoRI_2 | AATTGAAGTTACAGATCGGAAGAGCGTCGTGTAGGGAAAGAGTGT  | 5'P |
| B70_Ada_EcoRI_2 | AATTAGCTGAGGAGATCGGAAGAGCGTCGTGTAGGGAAAGAGTGT  | 5'P |
| B71_Ada_EcoRI_2 | AATTGATCAGAAAGATCGGAAGAGCGTCGTGTAGGGAAAGAGTGT  | 5'P |
| B72_Ada_EcoRI_2 | AATTACGACTCCAGATCGGAAGAGCGTCGTGTAGGGAAAGAGTGT  | 5'P |
| B73_Ada_EcoRI_2 | AATTGCGATTCTTAGATCGGAAGAGCGTCGTGTAGGGAAAGAGTGT | 5'P |

|                 |                                                |     |
|-----------------|------------------------------------------------|-----|
| B74_Ada_EcoRI_2 | AATTGCATGGAGGAGATCGGAAGAGCGTCGTGTAGGGAAAGAGTGT | 5'P |
| B75_Ada_EcoRI_2 | AATTGCCGAAGATAGATCGGAAGAGCGTCGTGTAGGGAAAGAGTGT | 5'P |
| B76_Ada_EcoRI_2 | AATTGCGCCTCCAAGATCGGAAGAGCGTCGTGTAGGGAAAGAGTGT | 5'P |
| B77_Ada_EcoRI_2 | AATTGCATTCTTCAGATCGGAAGAGCGTCGTGTAGGGAAAGAGTGT | 5'P |
| B78_Ada_EcoRI_2 | AATTGCCAGAGGTAGATCGGAAGAGCGTCGTGTAGGGAAAGAGTGT | 5'P |
| B79_Ada_EcoRI_2 | AATTGCGGAGATGAGATCGGAAGAGCGTCGTGTAGGGAAAGAGTGT | 5'P |
| B80_Ada_EcoRI_2 | AATTGCACCTCACAGATCGGAAGAGCGTCGTGTAGGGAAAGAGTGT | 5'P |
| B81_Ada_EcoRI_2 | AATTGCCTTCTCAAGATCGGAAGAGCGTCGTGTAGGGAAAGAGTGT | 5'P |
| B82_Ada_EcoRI_2 | AATTGCGCAAGGTAGATCGGAAGAGCGTCGTGTAGGGAAAGAGTGT | 5'P |
| B83_Ada_EcoRI_2 | AATTGCCAGGATGAGATCGGAAGAGCGTCGTGTAGGGAAAGAGTGT | 5'P |
| B84_Ada_EcoRI_2 | AATTGCAGCCTAAAGATCGGAAGAGCGTCGTGTAGGGAAAGAGTGT | 5'P |
| B85_Ada_EcoRI_2 | AATTGGAGTTCGAGATCGGAAGAGCGTCGTGTAGGGAAAGAGTGT  | 5'P |
| B86_Ada_EcoRI_2 | AATTGAGTGAGGCAGATCGGAAGAGCGTCGTGTAGGGAAAGAGTGT | 5'P |
| B87_Ada_EcoRI_2 | AATTGCCAAGAATAGATCGGAAGAGCGTCGTGTAGGGAAAGAGTGT | 5'P |
| B88_Ada_EcoRI_2 | AATTGGACCTCTAAGATCGGAAGAGCGTCGTGTAGGGAAAGAGTGT | 5'P |
| B89_Ada_EcoRI_2 | AATTGAGTTCCTAGATCGGAAGAGCGTCGTGTAGGGAAAGAGTGT  | 5'P |
| B90_Ada_EcoRI_2 | AATTGCCGCGAGTAGATCGGAAGAGCGTCGTGTAGGGAAAGAGTGT | 5'P |
| B91_Ada_EcoRI_2 | AATTGCGAGAGTGAGATCGGAAGAGCGTCGTGTAGGGAAAGAGTGT | 5'P |
| B92_Ada_EcoRI_2 | AATTGGACACTAAAGATCGGAAGAGCGTCGTGTAGGGAAAGAGTGT | 5'P |
| B93_Ada_EcoRI_2 | AATTGACATTCCGAGATCGGAAGAGCGTCGTGTAGGGAAAGAGTGT | 5'P |
| B94_Ada_EcoRI_2 | AATTGGATAAGGCAGATCGGAAGAGCGTCGTGTAGGGAAAGAGTGT | 5'P |
| B95_Ada_EcoRI_2 | AATTGAGCGGAATAGATCGGAAGAGCGTCGTGTAGGGAAAGAGTGT | 5'P |
| B96_Ada_EcoRI_2 | AATTGCCGCCGTAAGATCGGAAGAGCGTCGTGTAGGGAAAGAGTGT | 5'P |
|                 |                                                |     |
|                 |                                                |     |
