# Supplementary material for: Optimized double-digest genotyping by sequencing (ddGBS) method with high-density SNP markers and high genotyping accuracy for chickens
Source: PubMed Central journal article supplement (PMC5466311; doi:10.1371/journal.pone.0179073), 2017-06-09
Supplement: pone.0179073.s005.pdf [file pone.0179073.s005.pdf]

**S3 Table. Number of predicted fragments obtained from seven enzymes and their distribution across the chromosomes.**

| Chromosome |           | <i>Msp</i> I |                | <i>Mse</i> I |                | <i>Pst</i> I |                | <i>EcoR</i> I |                | <i>Bgl</i> II |                | <i>ApeK</i> I |                | <i>HinP</i> I |                |
|------------|-----------|--------------|----------------|--------------|----------------|--------------|----------------|---------------|----------------|---------------|----------------|---------------|----------------|---------------|----------------|
| Chr.       | Size      | Sites        | Density (N/Mb) | Sites        | Density (N/Mb) | Sites        | Density (N/Mb) | Sites         | Density (N/Mb) | Sites         | Density (N/Mb) | Sites         | Density (N/Mb) | Sites         | Density (N/Mb) |
| chr1       | 195276750 | 87548        | 448            | 1294333      | 6628           | 129654       | 664            | 53635         | 275            | 67025         | 343            | 505146        | 2587           | 81727         | 419            |
| chr2       | 148809762 | 65509        | 440            | 1010713      | 6792           | 97855        | 658            | 41849         | 281            | 51283         | 345            | 380751        | 2559           | 62452         | 420            |
| chr3       | 110447801 | 50138        | 454            | 749246       | 6784           | 77380        | 701            | 31267         | 283            | 38433         | 348            | 298925        | 2706           | 49189         | 445            |
| chr4       | 90216835  | 44603        | 494            | 624900       | 6927           | 65519        | 726            | 25330         | 281            | 30383         | 337            | 254311        | 2819           | 43642         | 484            |
| chr5       | 59580361  | 36287        | 609            | 391339       | 6568           | 47306        | 794            | 16734         | 281            | 20121         | 338            | 184314        | 3094           | 34732         | 583            |
| chr6       | 34951654  | 22762        | 651            | 221531       | 6338           | 29626        | 848            | 9138          | 261            | 11342         | 325            | 117337        | 3357           | 22228         | 636            |
| chr7       | 36245040  | 22958        | 633            | 237666       | 6557           | 30078        | 830            | 9936          | 274            | 12232         | 337            | 119572        | 3299           | 23284         | 642            |
| chr8       | 28767244  | 21713        | 755            | 185824       | 6460           | 25102        | 873            | 7793          | 271            | 9317          | 324            | 101814        | 3539           | 20186         | 702            |
| chr9       | 23441680  | 18713        | 798            | 141736       | 6046           | 22894        | 977            | 6074          | 259            | 7482          | 319            | 91338         | 3896           | 17897         | 763            |
| chr10      | 19911089  | 17874        | 898            | 118926       | 5973           | 19451        | 977            | 5051          | 254            | 6416          | 322            | 78914         | 3963           | 17777         | 893            |
| chr11      | 19401079  | 15990        | 824            | 125077       | 6447           | 18071        | 931            | 5297          | 273            | 6306          | 325            | 72451         | 3734           | 15802         | 814            |
| chr12      | 19897011  | 17109        | 860            | 118333       | 5947           | 20596        | 1035           | 5018          | 252            | 6264          | 315            | 81369         | 4090           | 16449         | 827            |
| chr13      | 17760035  | 18251        | 1028           | 97346        | 5481           | 20626        | 1161           | 4436          | 250            | 5637          | 317            | 81449         | 4586           | 16664         | 938            |
| chr14      | 15161805  | 17574        | 1159           | 81081        | 5348           | 18387        | 1213           | 3770          | 249            | 4720          | 311            | 73876         | 4873           | 16087         | 1061           |
| chr15      | 12656803  | 13846        | 1094           | 66684        | 5269           | 15004        | 1185           | 3062          | 242            | 3895          | 308            | 60041         | 4744           | 13599         | 1074           |
| chr16      | 535270    | 1044         | 1950           | 1057         | 1975           | 440          | 822            | 106           | 198            | 122           | 228            | 2107          | 3936           | 908           | 1696           |
| chr17      | 10454150  | 15421        | 1475           | 47305        | 4525           | 15067        | 1441           | 2207          | 211            | 3110          | 297            | 59761         | 5716           | 13603         | 1301           |
| chr18      | 11219875  | 14722        | 1312           | 54164        | 4828           | 14641        | 1305           | 2523          | 225            | 3366          | 300            | 58738         | 5235           | 13534         | 1206           |
| chr19      | 9983394   | 13671        | 1369           | 48503        | 4858           | 13045        | 1307           | 2164          | 217            | 2915          | 292            | 52366         | 5245           | 12750         | 1277           |
| chr20      | 14302601  | 16801        | 1175           | 71656        | 5010           | 17992        | 1258           | 3281          | 229            | 4301          | 301            | 70816         | 4951           | 14518         | 1015           |
| chr21      | 6802778   | 9331         | 1372           | 31224        | 4590           | 8992         | 1322           | 1553          | 228            | 2015          | 296            | 37053         | 5447           | 8655          | 1272           |
| chr22      | 4081097   | 4523         | 1108           | 20365        | 4990           | 5189         | 1271           | 956           | 234            | 1192          | 292            | 21018         | 5150           | 4575          | 1121           |
| chr23      | 5723239   | 11418        | 1995           | 22048        | 3852           | 9248         | 1616           | 1040          | 182            | 1561          | 273            | 38222         | 6678           | 10174         | 1778           |
| chr24      | 6323281   | 9309         | 1472           | 25811        | 4082           | 9880         | 1562           | 1207          | 191            | 1776          | 281            | 39410         | 6233           | 8787          | 1390           |
| chr25      | 2191139   | 6218         | 2838           | 5447         | 2486           | 3301         | 1507           | 328           | 150            | 497           | 227            | 14580         | 6654           | 5450          | 2487           |
| chr26      | 5329985   | 10891        | 2043           | 18089        | 3394           | 9572         | 1796           | 890           | 167            | 1401          | 263            | 38789         | 7278           | 9454          | 1774           |
| chr27      | 5209285   | 10400        | 1996           | 16463        | 3160           | 7370         | 1415           | 932           | 179            | 1369          | 263            | 30764         | 5906           | 9261          | 1778           |
| chr28      | 4742627   | 10153        | 2141           | 15542        | 3277           | 7144         | 1506           | 847           | 179            | 1177          | 248            | 29925         | 6310           | 8939          | 1885           |
| chrZ       | 82363669  | 49579        | 602            | 514770       | 6250           | 60422        | 734            | 23016         | 279            | 27168         | 330            | 235789        | 2863           | 46288         | 562            |
| chrW       | 1248174   | 1254         | 1005           | 5193         | 4160           | 537          | 430            | 226           | 181            | 385           | 308            | 2879          | 2307           | 857           | 687            |
| Total      |           | 655610       |                | 6362372      |                | 820389       |                | 269666        |                | 333211        |                | 3233825       |                | 619468        |                |
