# Supplementary material for: Optimized double-digest genotyping by sequencing (ddGBS) method with high-density SNP markers and high genotyping accuracy for chickens
Source: PubMed Central journal article supplement (PMC5466311; doi:10.1371/journal.pone.0179073), 2017-06-09
Supplement: pone.0179073.s006.pdf [file pone.0179073.s006.pdf]

**S4 Table. Number of genes, SNPs, and novel SNPs discovered from ddGBS, 60K, and 600K SNP chips.**

| Chr.  | Chromosome    |        | ddGBS   |            |                | 60K Illum. |                | 600K Aff. |                |
|-------|---------------|--------|---------|------------|----------------|------------|----------------|-----------|----------------|
|       | Size          | Genes  | SNPs    | Novel SNPs | Density (N/Mb) | SNPs       | Density (N/Mb) | SNPs      | Density (N/Mb) |
| 1     | 195,276,750   | 2,768  | 58,839  | 20,747     | 301            | 7792       | 40             | 106607    | 546            |
| 2     | 148,809,762   | 1,926  | 45,818  | 15,867     | 308            | 5794       | 39             | 66908     | 450            |
| 3     | 110,447,801   | 1,549  | 34,272  | 11,661     | 310            | 4464       | 40             | 59738     | 541            |
| 4     | 90,216,835    | 1,475  | 28,865  | 9,671      | 320            | 3641       | 40             | 45291     | 502            |
| 5     | 59,580,361    | 1,191  | 19,024  | 6,507      | 319            | 2422       | 41             | 33047     | 555            |
| 6     | 34,951,654    | 640    | 11,675  | 3,722      | 334            | 1916       | 55             | 23295     | 666            |
| 7     | 36,245,040    | 653    | 11,281  | 3,774      | 311            | 1991       | 55             | 22790     | 629            |
| 8     | 28,767,244    | 633    | 8,776   | 3,089      | 305            | 1593       | 55             | 18685     | 650            |
| 9     | 23,441,680    | 532    | 7,518   | 2,549      | 321            | 1343       | 57             | 19590     | 836            |
| 10    | 19,911,089    | 515    | 6,244   | 2,163      | 314            | 1472       | 74             | 20756     | 1042           |
| 11    | 19,401,079    | 442    | 5,881   | 2,170      | 303            | 1418       | 73             | 15187     | 783            |
| 12    | 19,897,011    | 407    | 5,958   | 2,071      | 299            | 1526       | 77             | 15939     | 801            |
| 13    | 17,760,035    | 441    | 5,256   | 1,937      | 296            | 1293       | 73             | 12323     | 694            |
| 14    | 15,161,805    | 487    | 4,337   | 1,533      | 286            | 1194       | 79             | 14893     | 982            |
| 15    | 12,656,803    | 430    | 3,616   | 1,388      | 286            | 1231       | 97             | 12013     | 949            |
| 16    | 535,270       | 86     | 134     | 76         | 250            | 28         | 52             | 1048      | 1958           |
| 17    | 10,454,150    | 376    | 2,749   | 1,157      | 263            | 1034       | 99             | 10812     | 1034           |
| 18    | 11,219,875    | 377    | 2,913   | 1,104      | 260            | 1016       | 91             | 11925     | 1063           |
| 19    | 9,983,394     | 383    | 2,658   | 1,014      | 266            | 1008       | 101            | 11047     | 1107           |
| 20    | 14,302,601    | 443    | 3,914   | 1,499      | 274            | 1731       | 121            | 10968     | 767            |
| 21    | 6,802,778     | 286    | 1,983   | 746        | 291            | 938        | 138            | 10440     | 1535           |
| 22    | 4,081,097     | 147    | 825     | 391        | 202            | 359        | 88             | 5101      | 1250           |
| 23    | 5,723,239     | 268    | 1,568   | 723        | 274            | 754        | 132            | 7910      | 1382           |
| 24    | 6,323,281     | 214    | 1,533   | 621        | 242            | 873        | 138            | 8888      | 1406           |
| 25    | 2,191,139     | 255    | 401     | 193        | 183            | 267        | 122            | 3877      | 1769           |
| 26    | 5,329,985     | 279    | 1,123   | 429        | 211            | 790        | 148            | 7816      | 1466           |
| 27    | 5,209,285     | 334    | 1,176   | 539        | 226            | 621        | 119            | 7087      | 1360           |
| 28    | 4,742,627     | 299    | 1,073   | 456        | 226            | 765        | 161            | 7051      | 1487           |
| Z     | 82,363,669    | 1,146  | 12,313  | 4,491      | 149            | 2069       | 25             | 26833     | 326            |
| W     | 1,248,174     | 13     | 49      | 16         | 39             | 0          | 0              | 14        | 11             |
| Total | 1,003,035,513 | 18,995 | 291,772 | 102,304    | —              | 51,343     | —              | 617,879   | —              |
